# Supplementary material for: Never Change a Flowing System? The Effects of Retrograde Flow on Isolated Perfused Lungs and Vessels
Source: MDPI journal article supplement (doi:10.3390/cells10051210), 2021-05-15
Supplement: s1 [file s1]

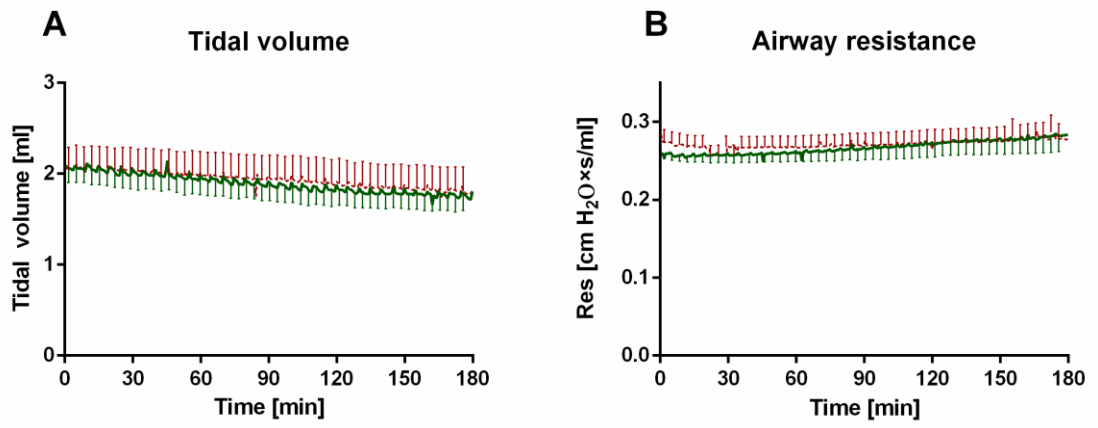

**Figure S1. Influence of perfusion direction on physiological parameters in IPL.** (A): Tidal volume (mean  $\pm$  SEM), (B): Airway resistance (mean  $\pm$  SEM). SEM is pruned to average of 5 min,  $n = 5$ .
